# Supplementary material for: Chronic Circadian Disruption and Sleep Restriction Influence Subjective Hunger, Appetite, and Food Preference
Source: MDPI journal article supplement (doi:10.3390/nu14091800), 2022-04-26
Supplement: s1 [file s1]

---

## Supplemental Information

# Chronic Circadian Disruption and Chronic Sleep Restriction Influence Subjective Hunger and Appetite

Andrew W McHill<sup>1,2,3,4\*</sup>, Joseph T Hull<sup>3,4</sup> and Elizabeth B Klerman<sup>3,4,5</sup>

<sup>1</sup> Sleep, Chronobiology, and Health Laboratory, School of Nursing, Oregon Health & Science University, Portland OR, USA.

<sup>2</sup> Oregon Institute of Occupational Health Sciences, Oregon Health & Science University, Portland OR, USA.

<sup>3</sup> Division of Sleep Medicine, Harvard Medical School, Boston, MA, USA.

<sup>4</sup> Division of Sleep and Circadian Disorders, Departments of Medicine and Neurology, Brigham and Women's Hospital, Boston, MA, USA.

<sup>5</sup> Department of Neurology, Massachusetts General Hospital, Boston, MA, USA.

\* Correspondence: Andrew W. McHill, Sleep, Chronobiology, and Health Laboratory, School of Nursing, Oregon Health & Science University, 3455 SW US Veterans Hospital Rd, Portland, OR 97239, USA. Email: mchill@ohsu.edu.

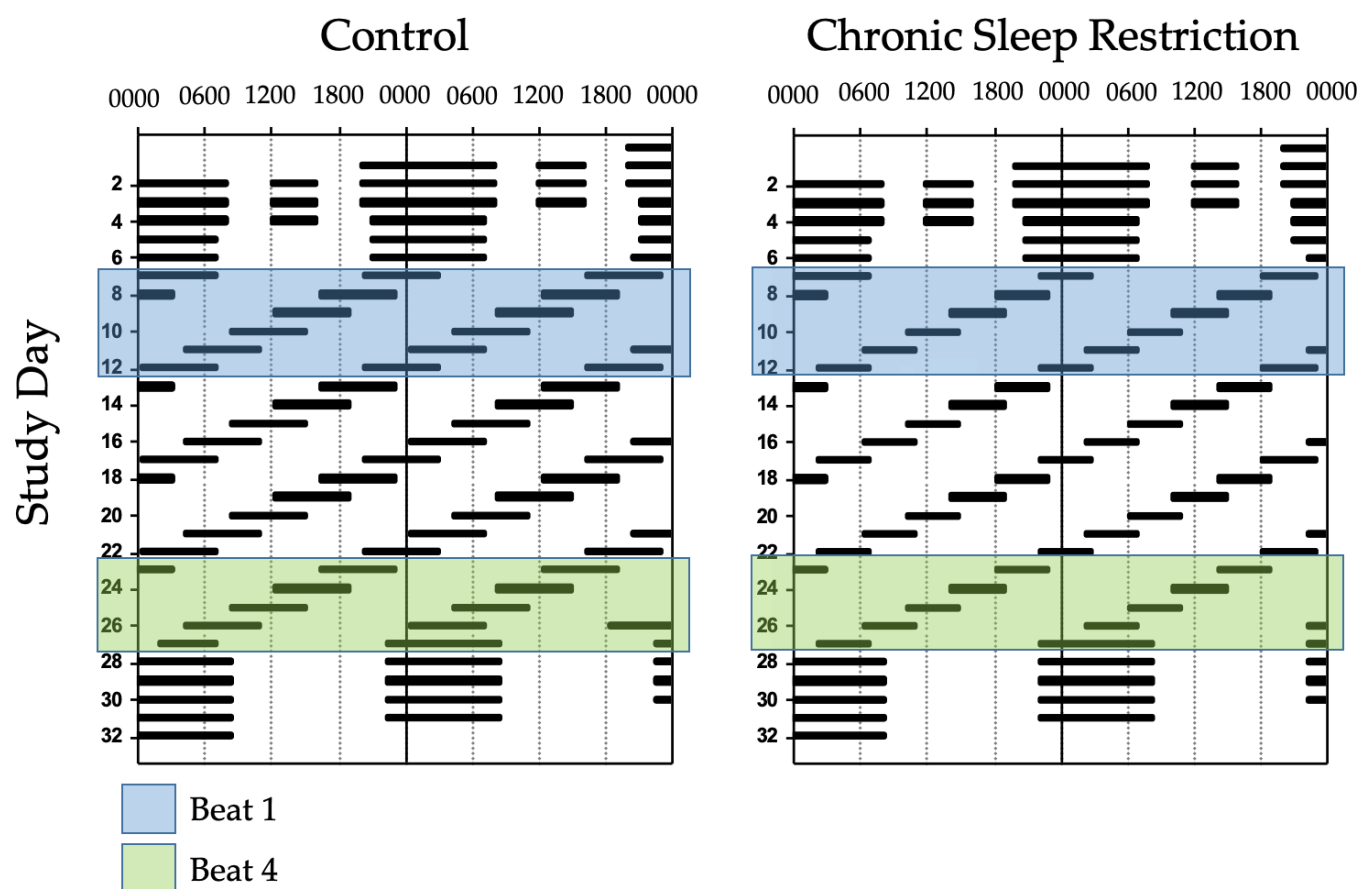

**Supplemental Figure S1.** Example study protocols for the Control ( $n = 7$ , 1:2 sleep:wake ratio, equivalent to 8 h sleep opportunity per 24 h day) and Chronic Sleep Restriction ( $n = 8$ , 1:3.3 sleep:wake ratio, equivalent to 5.6 per 24 h day) conditions across recurrent circadian disruption. Days are double plotted; each study day is plotted next to and below the previous day. Clock time is plotted on the top x-axis and study day down the y-axis. Solid black bars represent sleep opportunities and the shaded blue and green rectangles indicate Beat cycles 1 and 4, respectively (approximately 6 protocol days). Exact timing of all events for each participant depended on their habitual sleep and wake times immediately before the inpatient protocol.

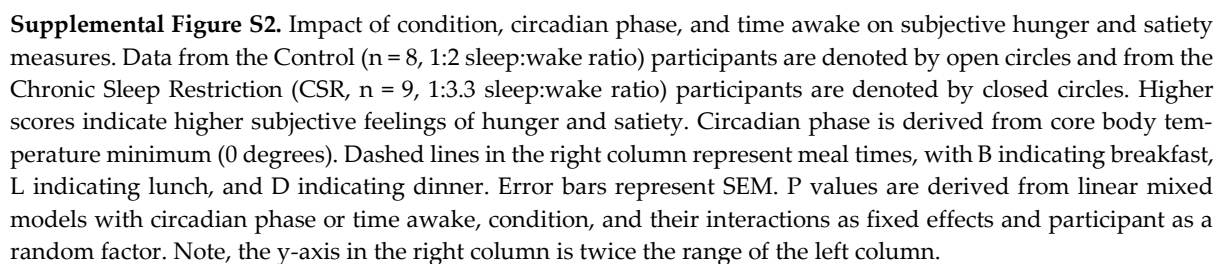

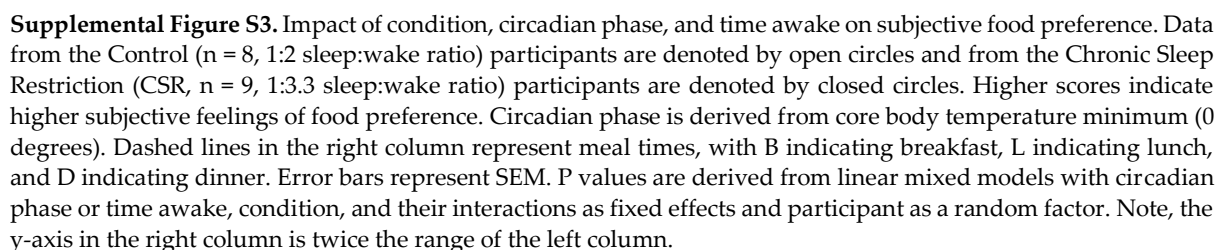

**Supplemental Table S1.** Participant demographics.

|                                                 | <b>Control<br/>(n=8)</b> | <b>CSR<br/>(n=9)</b> | <b>p-value</b> |
|-------------------------------------------------|--------------------------|----------------------|----------------|
| <b>Sex and Age</b>                              |                          |                      |                |
| Female, Male (#, %)                             | 5, 3<br>(0.6, 0.4)       | 5, 4<br>(0.6, 0.4)   | -              |
| Age (years, range)                              | 27.6<br>(22.0-34.0)      | 24.8<br>(20.0-30.0)  | 0.20           |
| <b>Body Composition</b>                         |                          |                      |                |
| Weight (kg, range)                              | 64.3<br>(47.2-85.4)      | 68.2<br>(57.8-82.8)  | 0.52           |
| Body Mass Index<br>(kg/m <sup>2</sup> , range)  | 23.1<br>(18.2-28.4)      | 24.8<br>(19.2-28.3)  | 0.36           |
| Body Mass Index <25<br>kg/m <sup>2</sup> (#, %) | 5<br>(0.6)               | 4<br>(0.4)           | -              |
| Body Mass Index >25<br>kg/m <sup>2</sup> (#, %) | 3<br>(0.4)               | 5<br>(0.6)           | -              |

p-values were derived via independent t-tests between groups.
